# Supplementary material for: Regulatory patterns analysis of transcription factor binding site clustered regions and identification of key genes in endometrial cancer
Source: PubMed Central journal article supplement — Comput Struct Biotechnol J. 2022 Jan 20;20:812–23. doi: 10.1016/j.csbj.2022.01.014 (PMC8844752; doi:10.1016/j.csbj.2022.01.014), 2022-01-20
Supplement: mmc1.pdf [file mmc1.pdf]

**A****TFCR in promoters**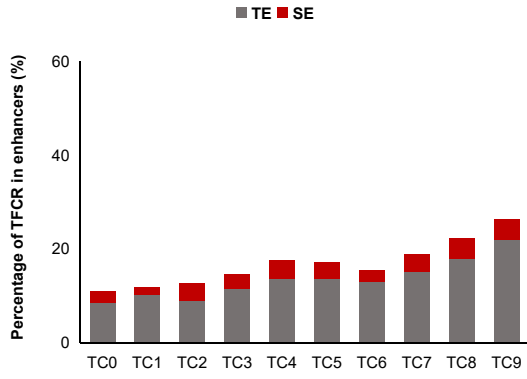**ATAC-peak in promoters**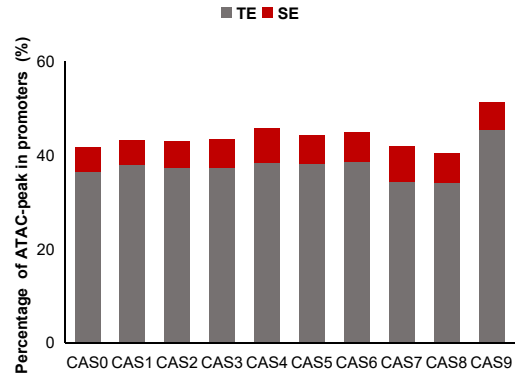**B****TFCR in promoters**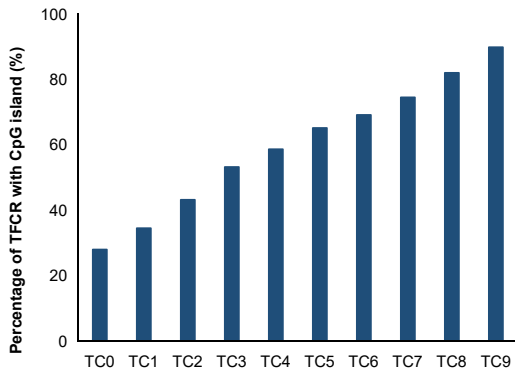**ATAC-peak in promoters**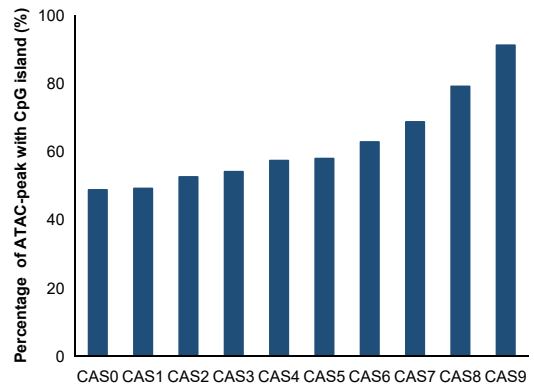**C****TFCR in enhancers**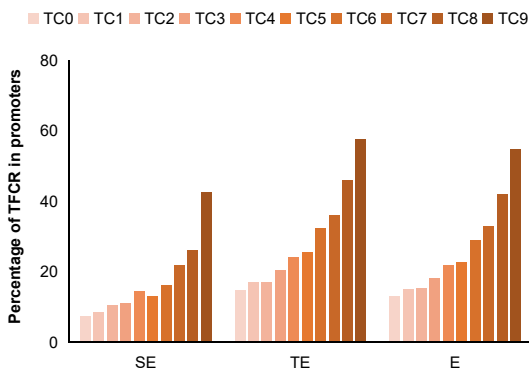**ATAC-peak in enhancers**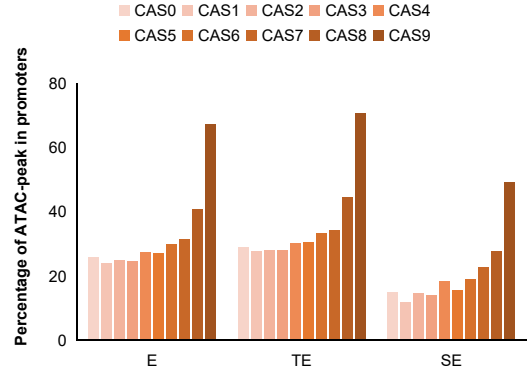**D****TFCR in enhancers**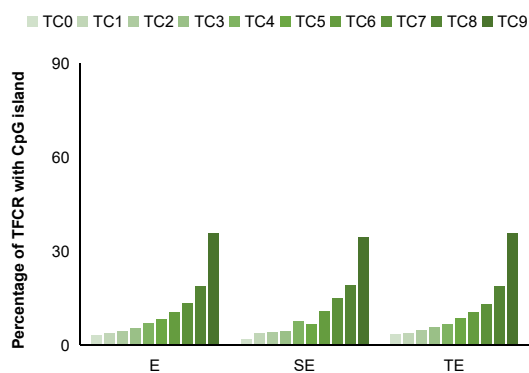**ATAC-peak in enhancers**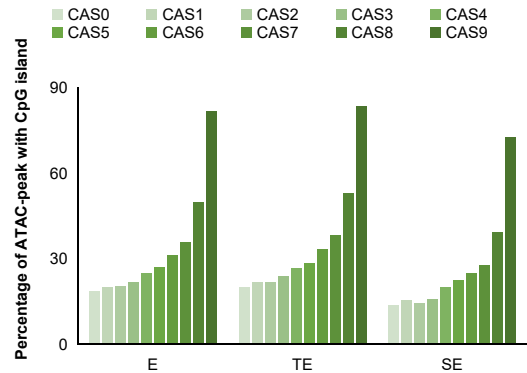

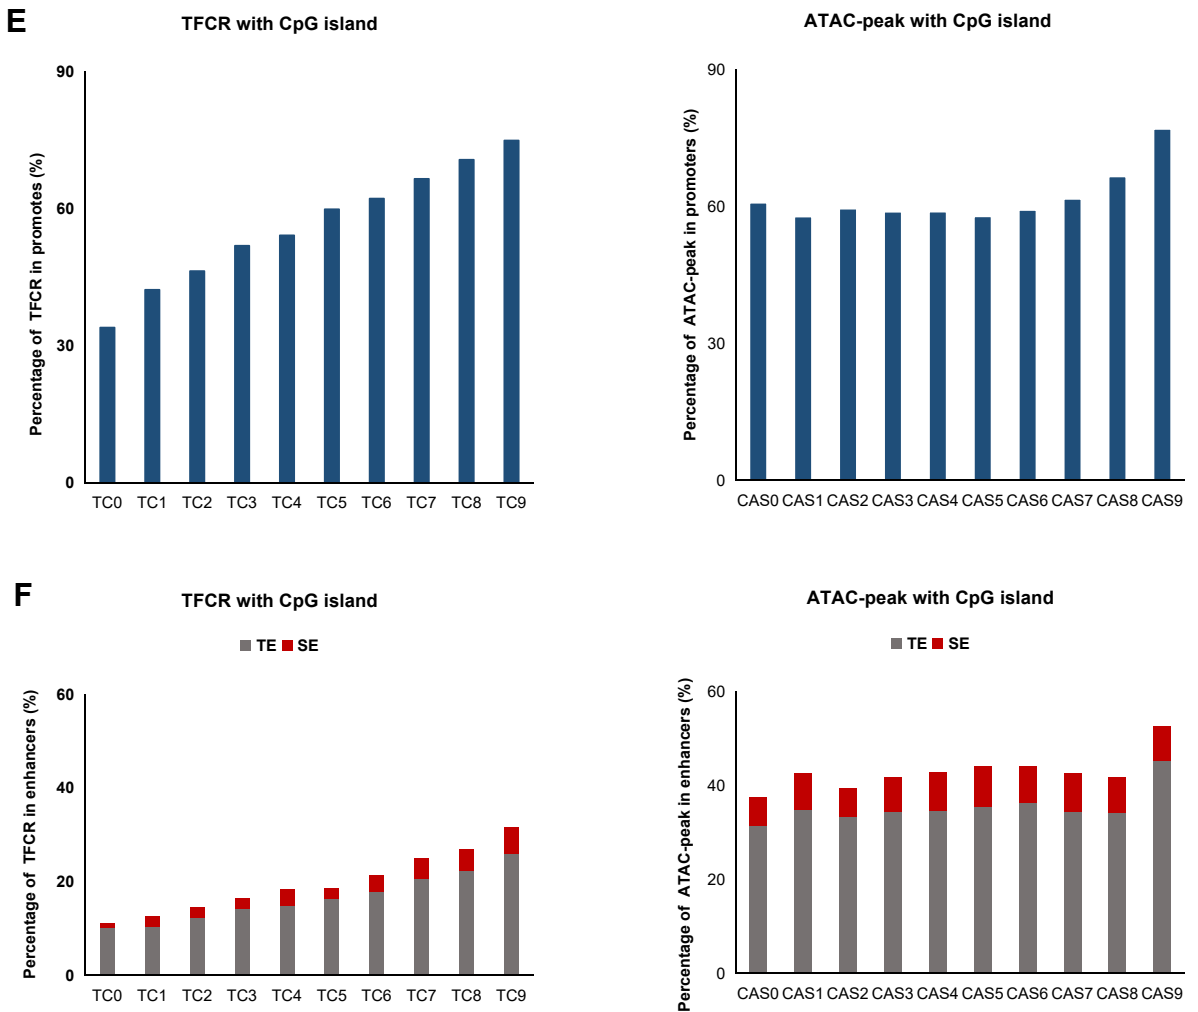

**Figure S1 Features of TFCRs and ATAC-seq peaks at genomic locations.** (A) Barplots shows the proportion of TFCRs (left) or ATAC-seq peaks (right) overlapped with promoter, distributed in enhancer region. (B) Barplots shows the proportion of TFCRs (left) or ATAC-seq peaks (right) overlapped with promoter, distributed in CpG island. (C) Barplots shows the proportion of TFCRs (left) or ATAC-seq peaks (right) overlapped with enhancer, distributed in promoter region. (D) Barplots shows the proportion of TFCRs (left) or ATAC-seq peaks (right) overlapped with enhancer, distributed in CpG island. (E) Barplots shows the proportion of TFCRs (left) or ATAC-seq peaks (right) overlapped with CpG island, distributed in promoter region. (F) Barplots shows the proportion of TFCRs (left) or ATAC-seq peaks (right) overlapped with CpG island, distributed in enhancer region.

**A** TFCR located on all repeat elements

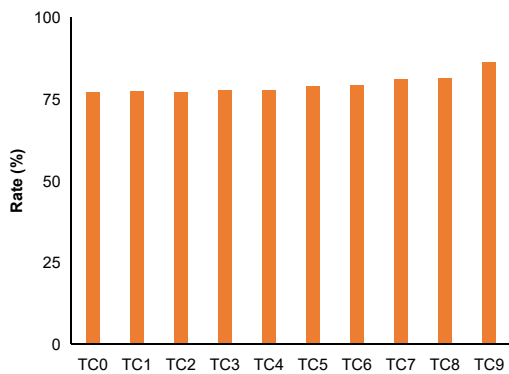

ATAC-seq peak located on all repeat elements

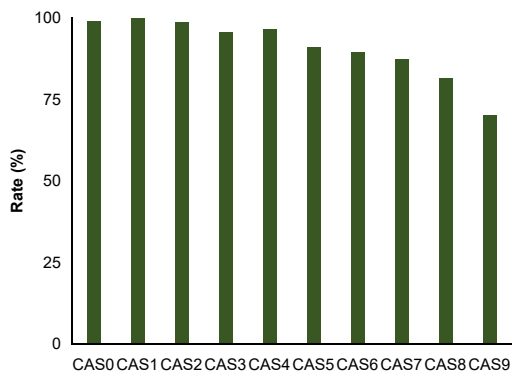

**B** TFCR located on DNA repeat elements

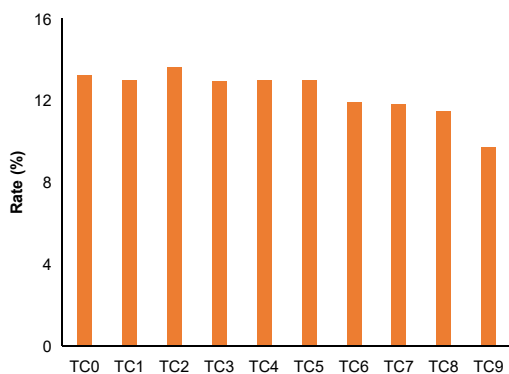

ATAC-seq peak located on DNA repeat elements

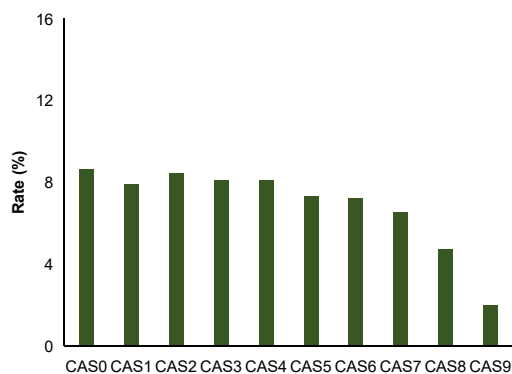

**C** TFCR located on LTR

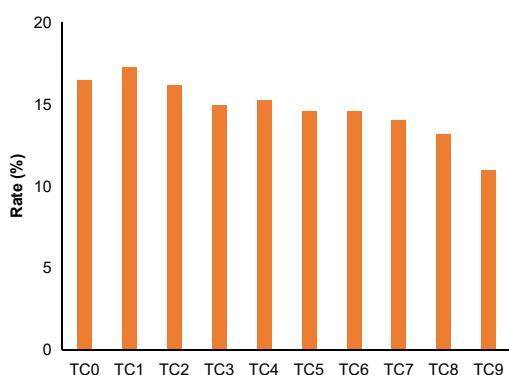

ATAC-seq peak located on LTR

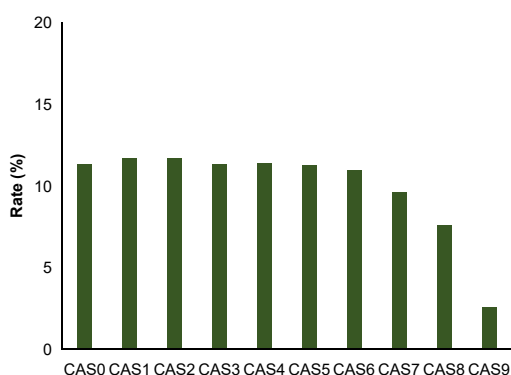

**D** TFCR located on LINE

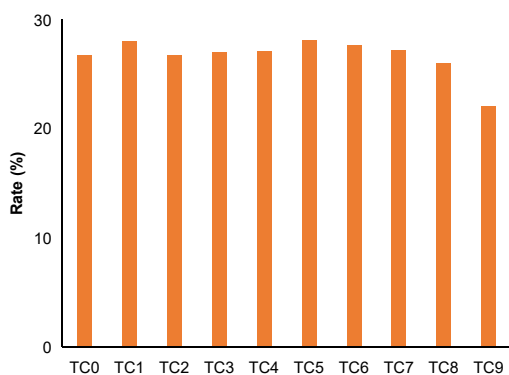

ATAC-seq peak located on LINE

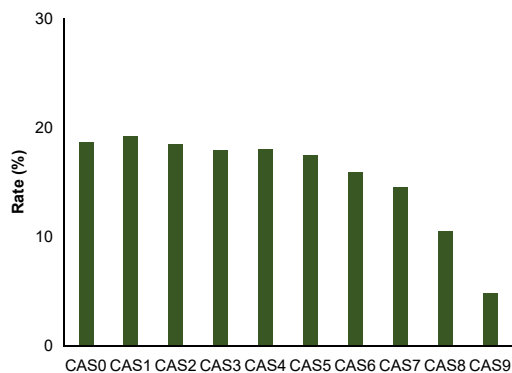

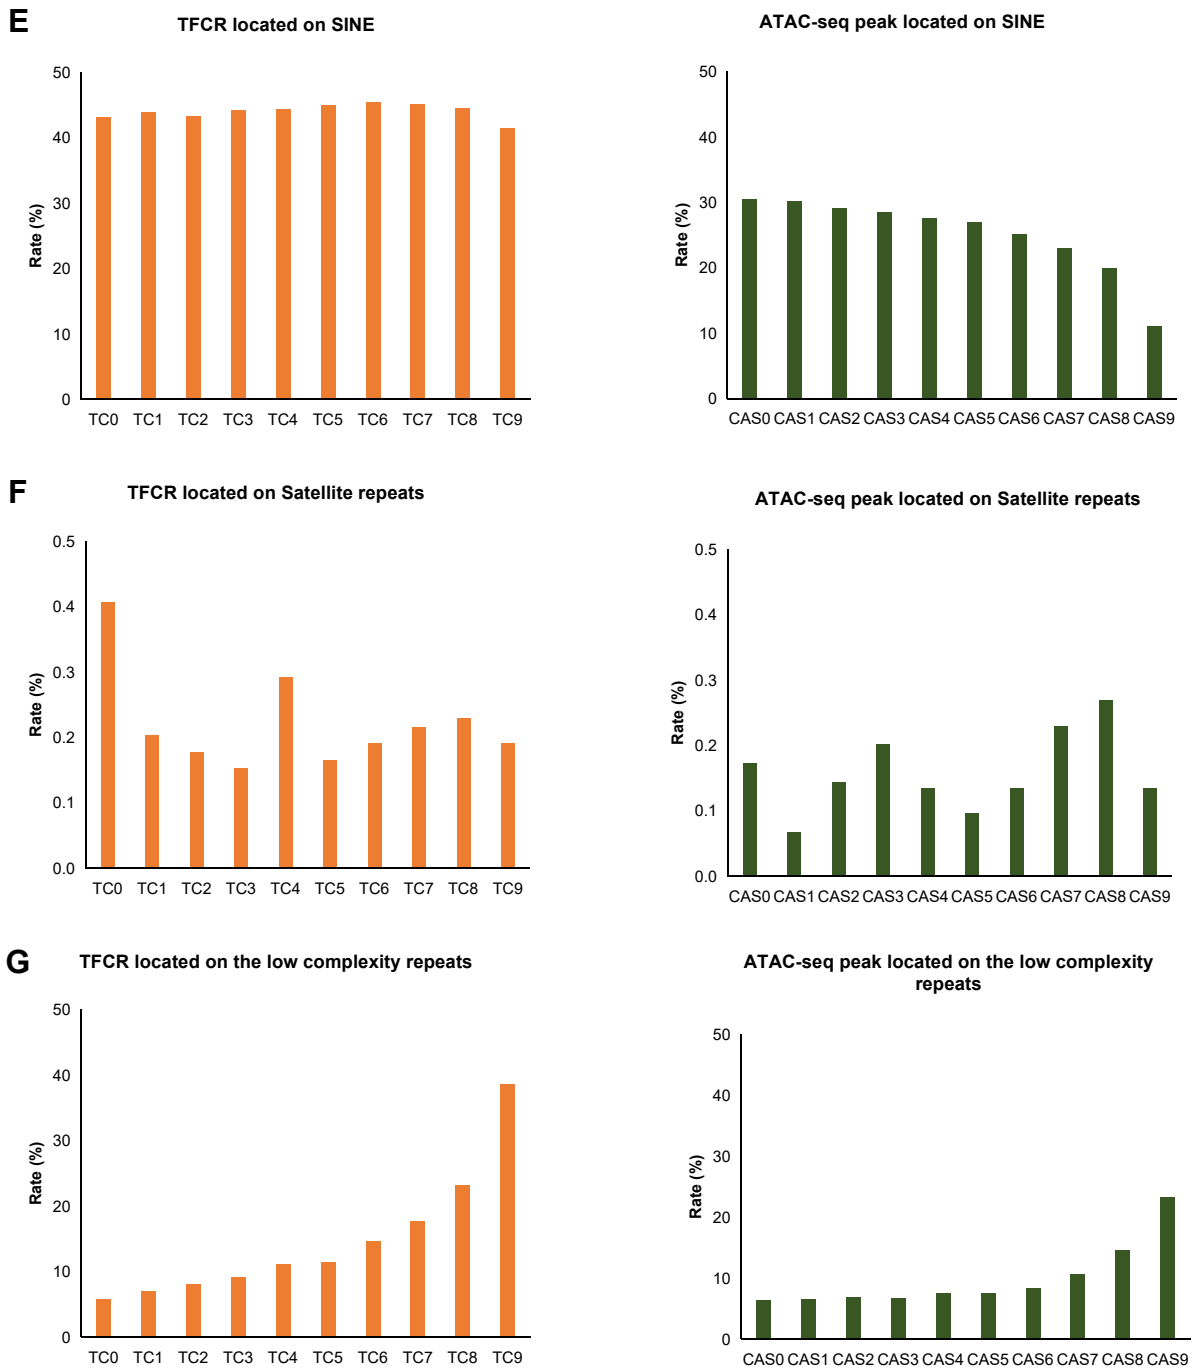

**Figure S2 Relationship between TFCR or ATAC-seq peak and repeat elements in the genome.**

(A-G) correspond to all repeat elements, DNA repeat elements, LTR, LINE, SINE, Satellite repeats and the low complexity repeats, respectively.

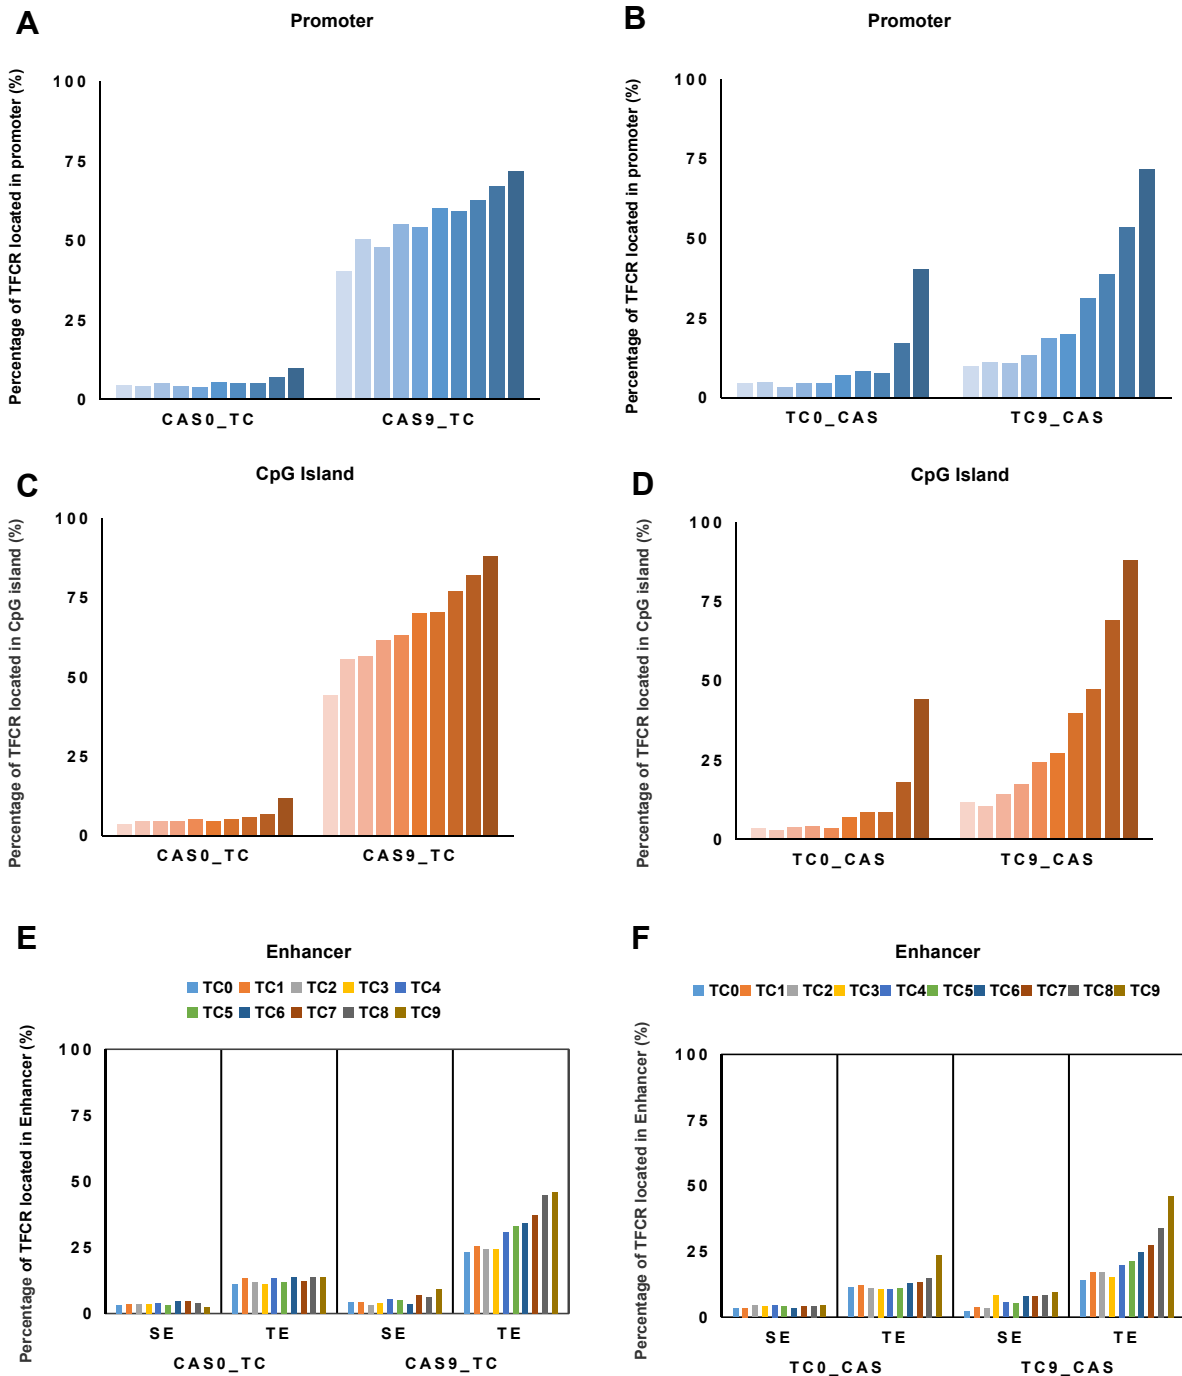

**Figure S3 The distribution of TF CR with transcription factor complexity and chromatin accessibility imbalance on the main regulatory elements. (A-F) the proportion of TF CRs with different chromatin accessibility (CAS0 and CAS9) or transcription factor complexity (TC0 and TC9) near gene promoters (A, B), CpG island (C, D), and enhancers (E, F) as a function of altered TC or CAS grade.**

**A** The correlation between chromatin accessibility score and gene expression in TFCRs

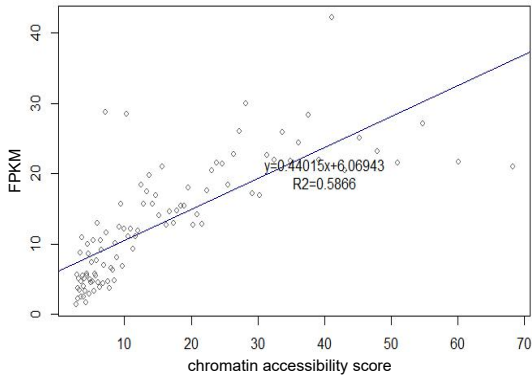

**B** The correlation between TF complexity and gene expression in TFCRs

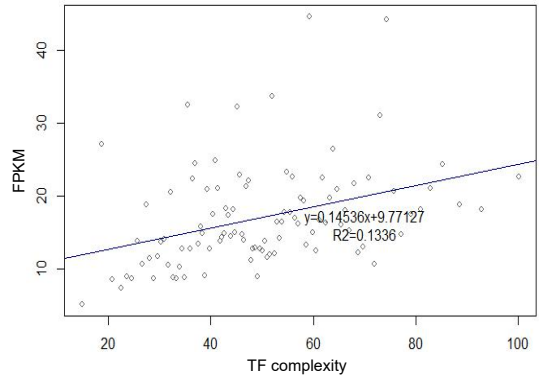

Overall TFCRs

**C**

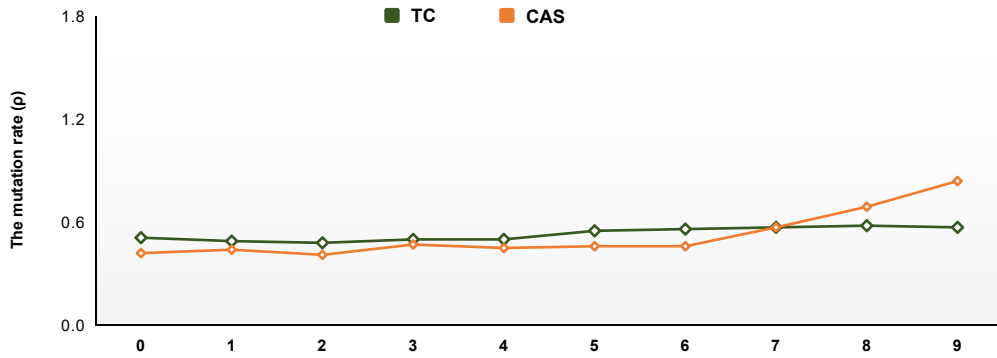

**Figure S4 Correlation analysis of chromatin accessibility score and TF complexity with gene expression in TFCRs.** Scatter plots show that chromatin accessibility score (A,  $R^2 = 0.59$ ) and TF complexity (B,  $R^2 = 0.13$ ) are positively correlated with FPKM in TFCRs. (C) The line graph shows the overall mutation rate of TFCRs (CAS: Orange; TC: Darkgreen).

**A****Random Genes-1**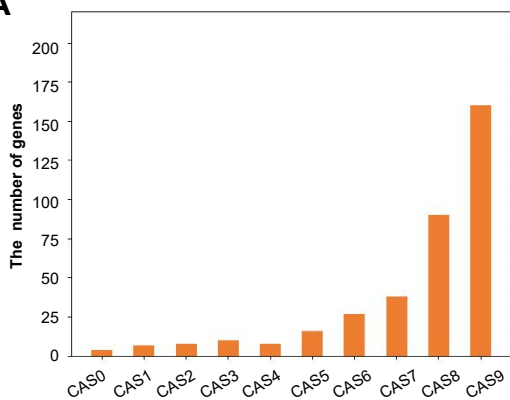**Random Genes-1**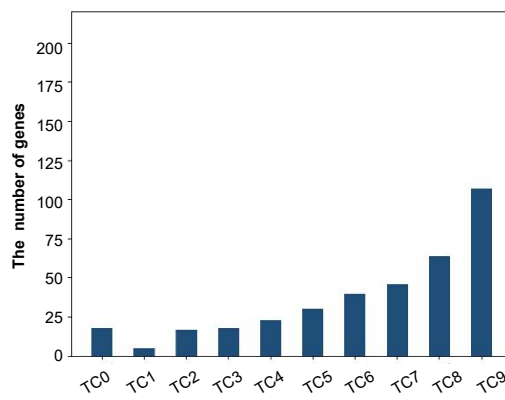**Random Genes-2**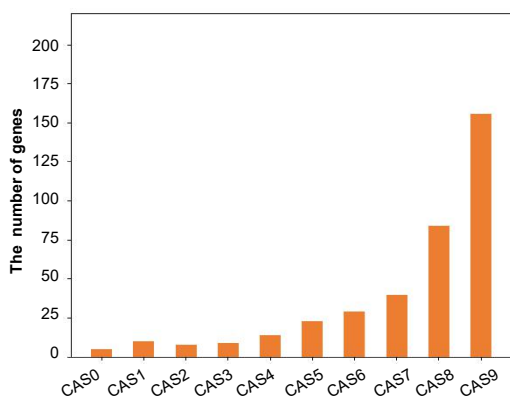**Random Genes-2**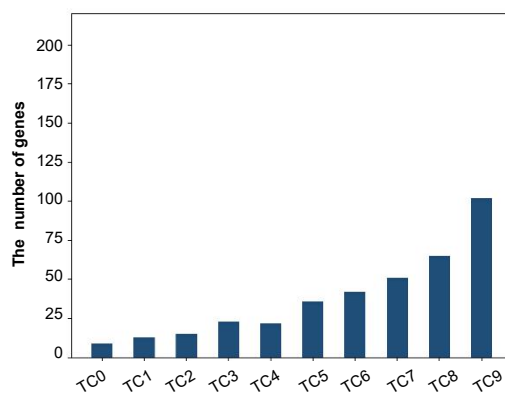**Random Genes-3**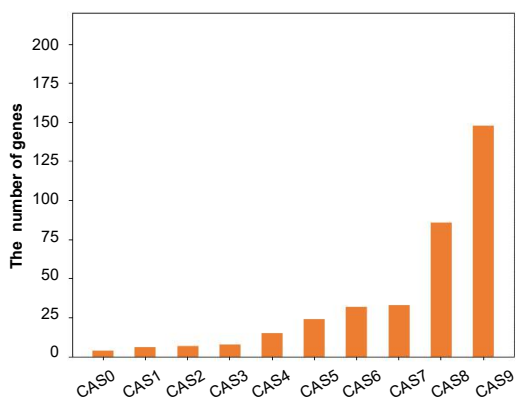**Random Genes-3**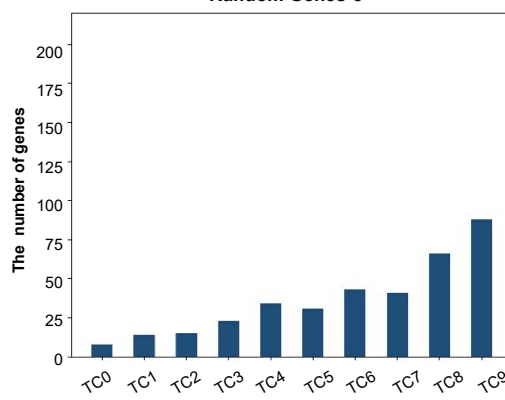**Random Genes-4**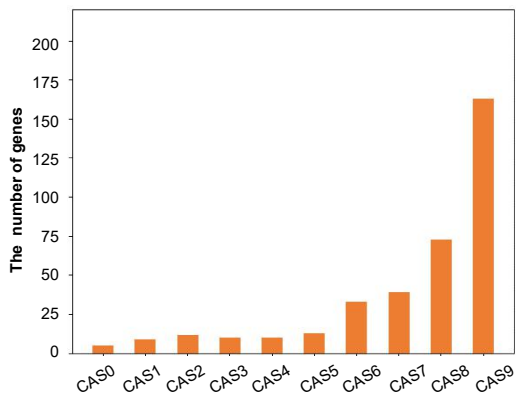**Random Genes-4**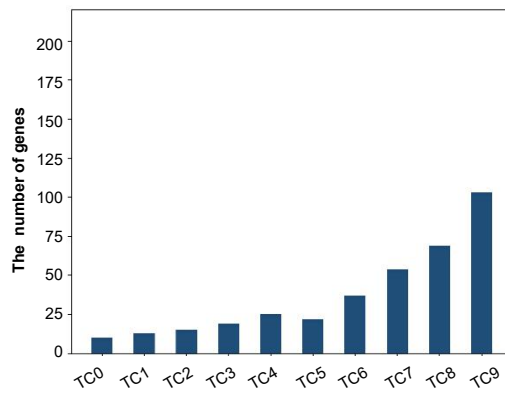

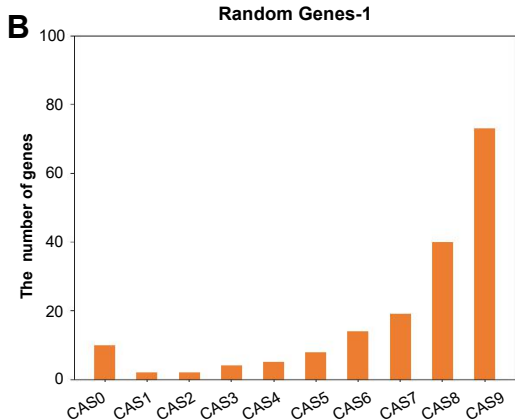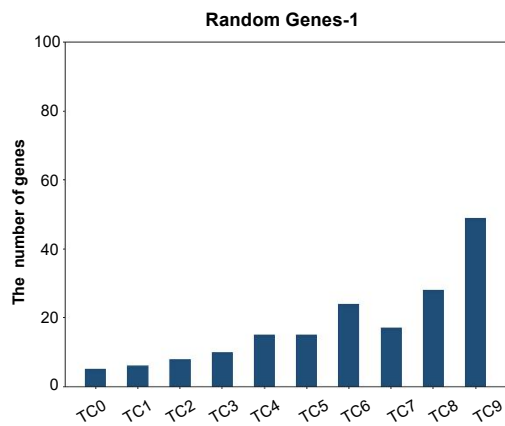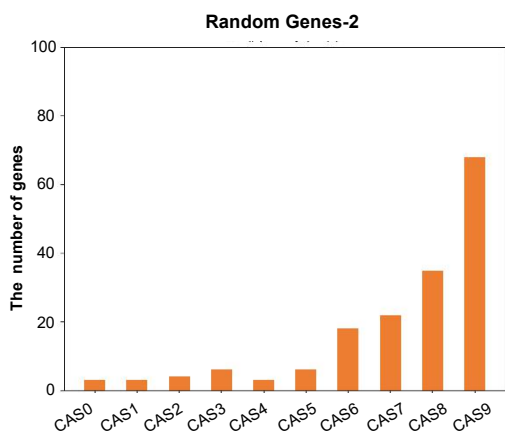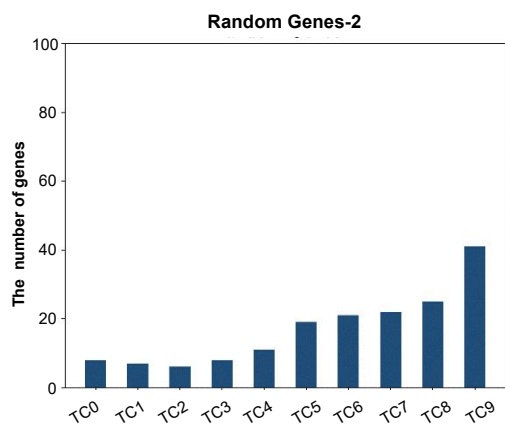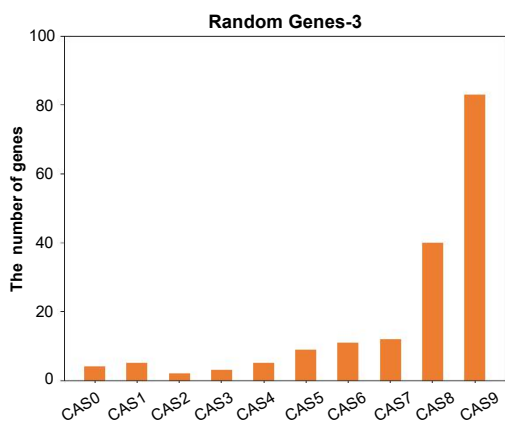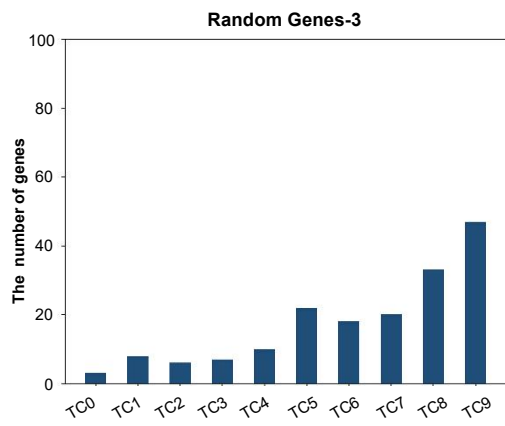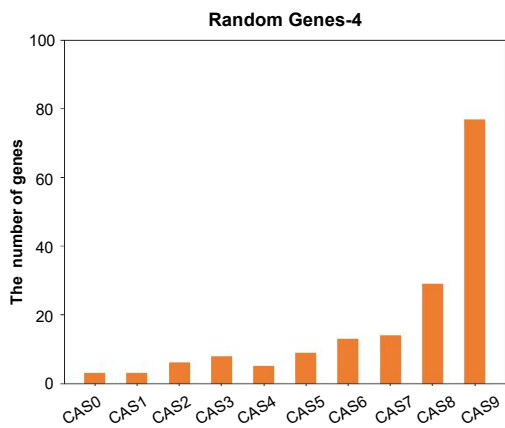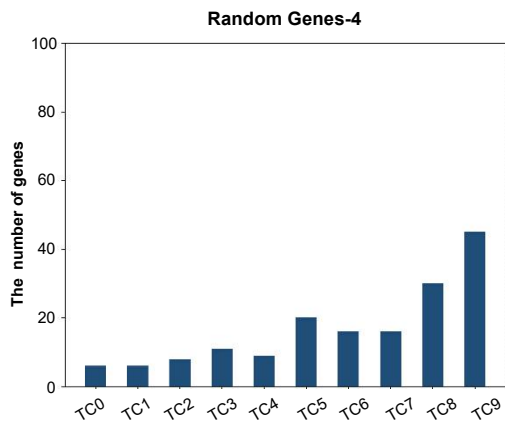



**C****Random Genes-1**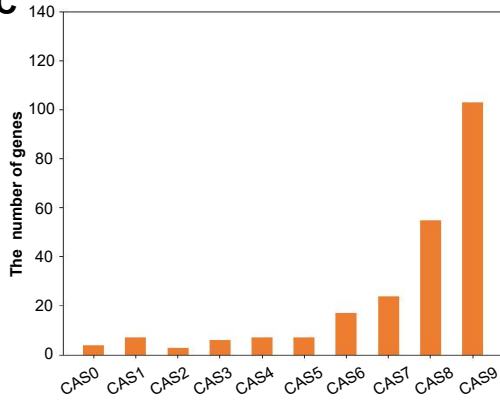**Random Genes-1**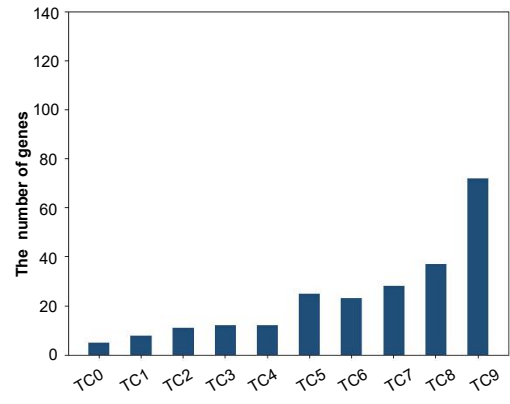**Random Genes-2**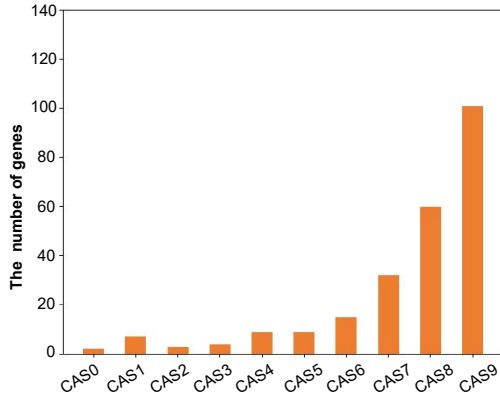**Random Genes-2**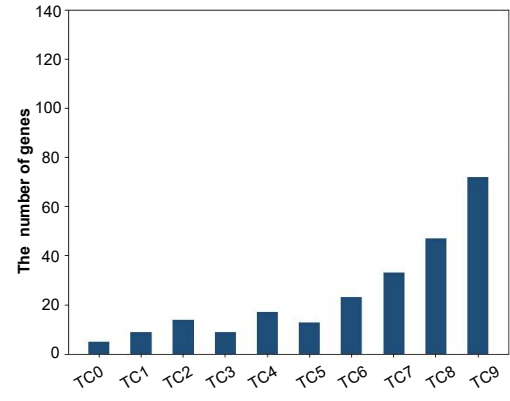**Random Genes-3**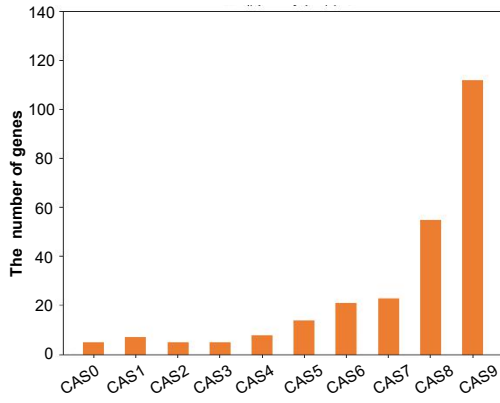**Random Genes-3**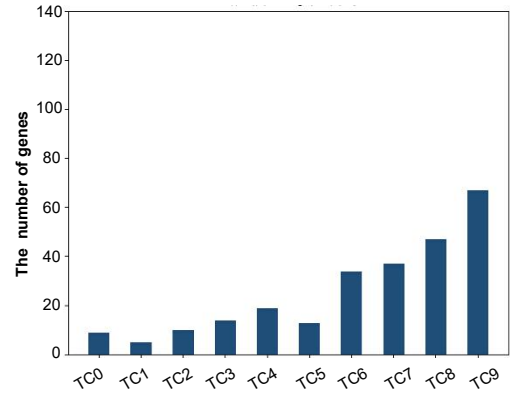**Random Genes-4**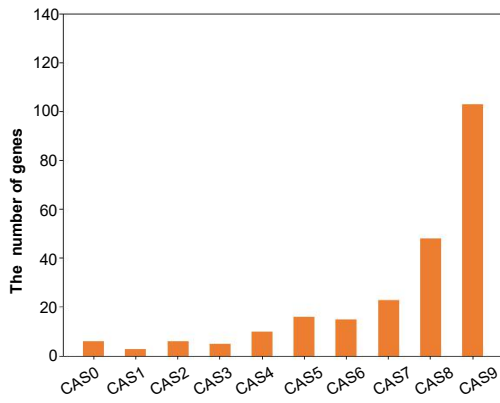**Random Genes-4**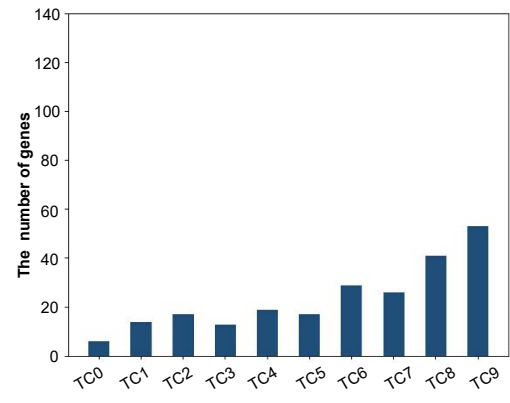

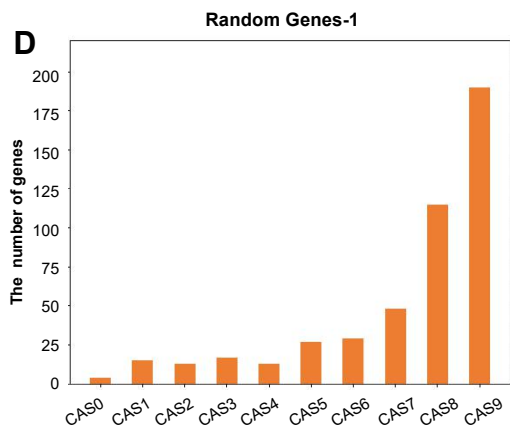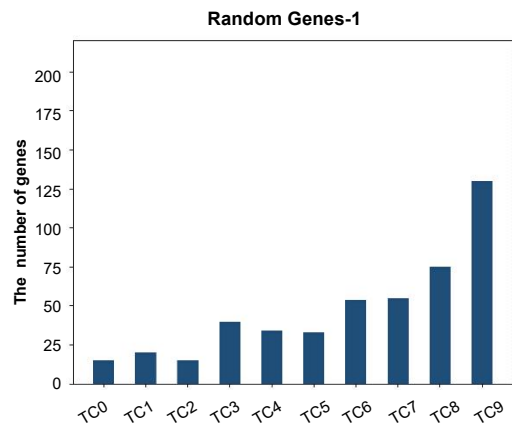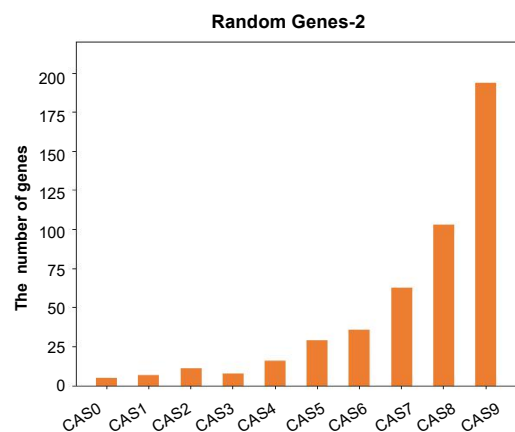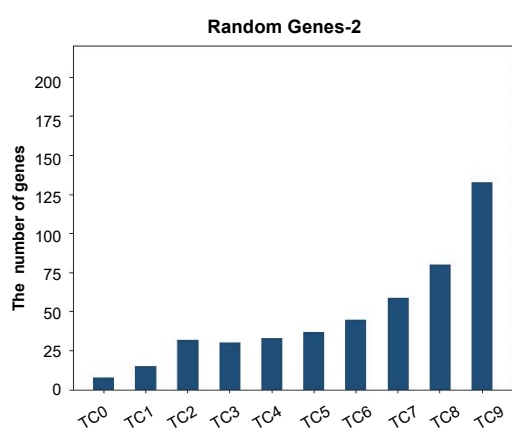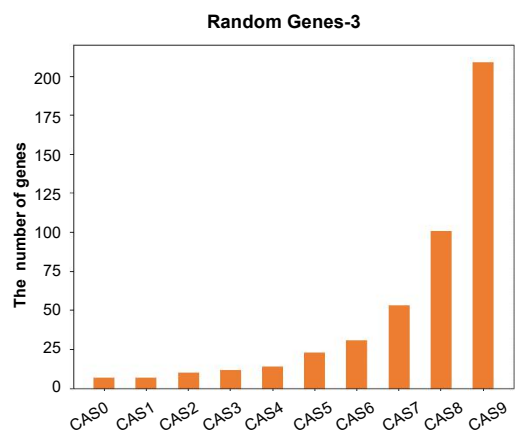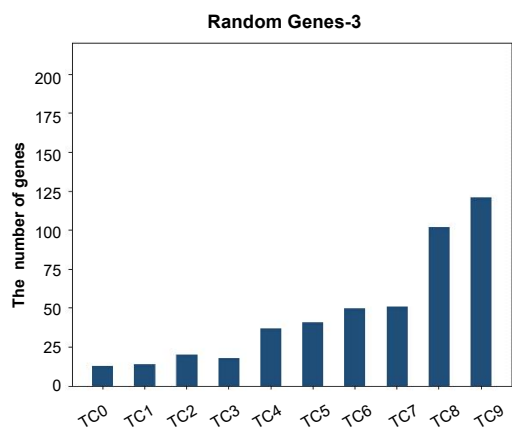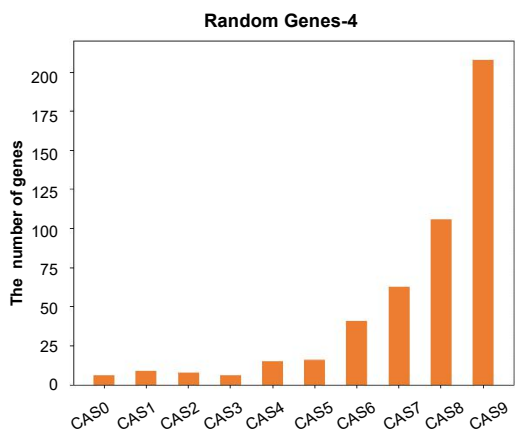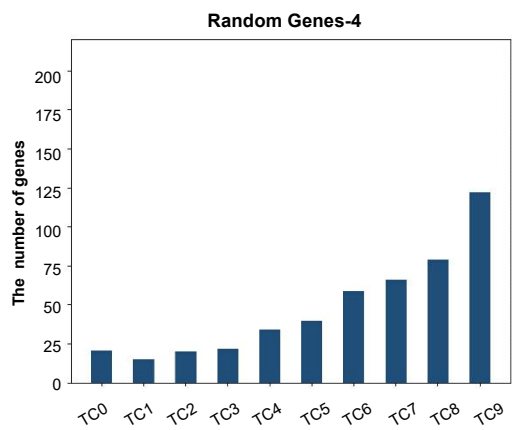

**Figure S5 Random controls for tumor key genes.** Generating random gene sets with equal numbers to the literature reported cancer driver gene sets and examination of the distribution of these genes across TFCR different TF complexity (TC, Darkblue) groups versus chromatin accessibility score (CAS, Orange) groups. Four cancer driver gene sets are shown as examples in which A to D correspond to the cancer driving genes reported in Nature (2014), Nature Reviews (2018), Cell (2020) and Nature Reviews Cancer (2020), respectively. Each control experiment was repeated for more than four times.

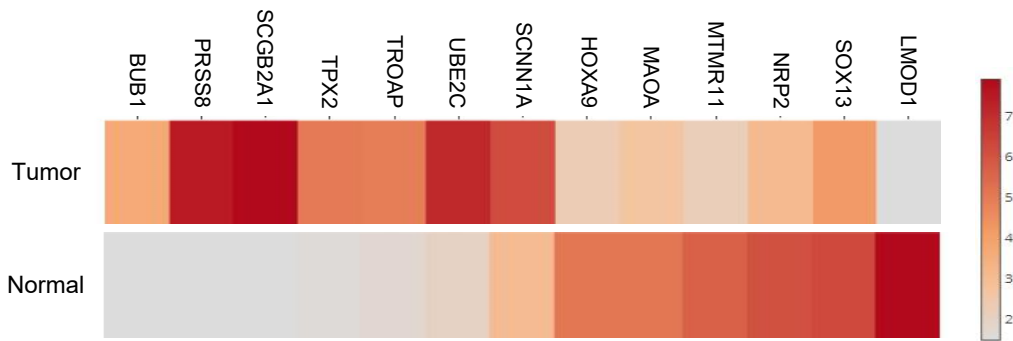

**Figure S6 Heatmap of differential expression of candidate cancer key genes.** GEPIA2 was used to investigate the expression of candidate cancer key genes in tumor tissues and normal tissues, among which 13 (*LMOD1*, *SOX13*, *NRP2*, *MTMR11*, *MAOA*, *HOXA9*, *SCNN1A*, *UBE2C*, *TROAP*, *TPX2*, *SCGB2A1*, *PRSS8* and *BUB1*) showed statistically significant differences ( $\log_2FC \geq 3$ ,  $P < 0.001$ ).

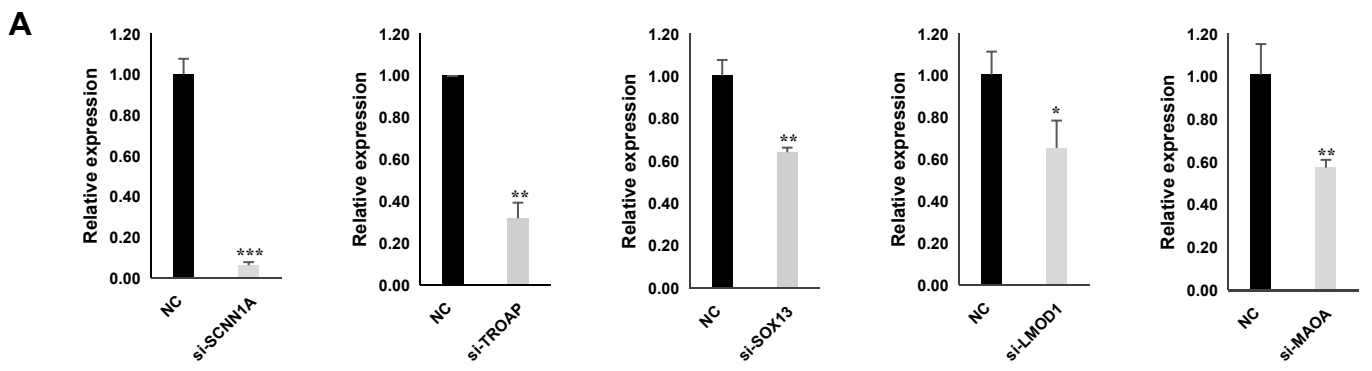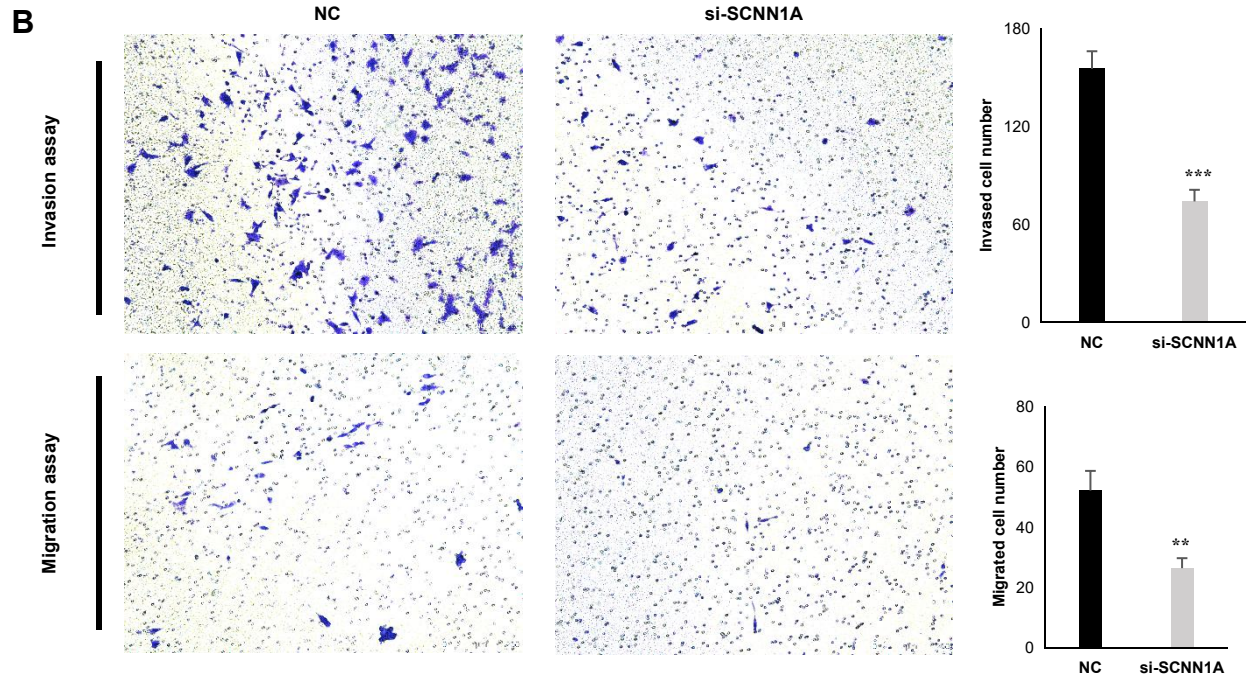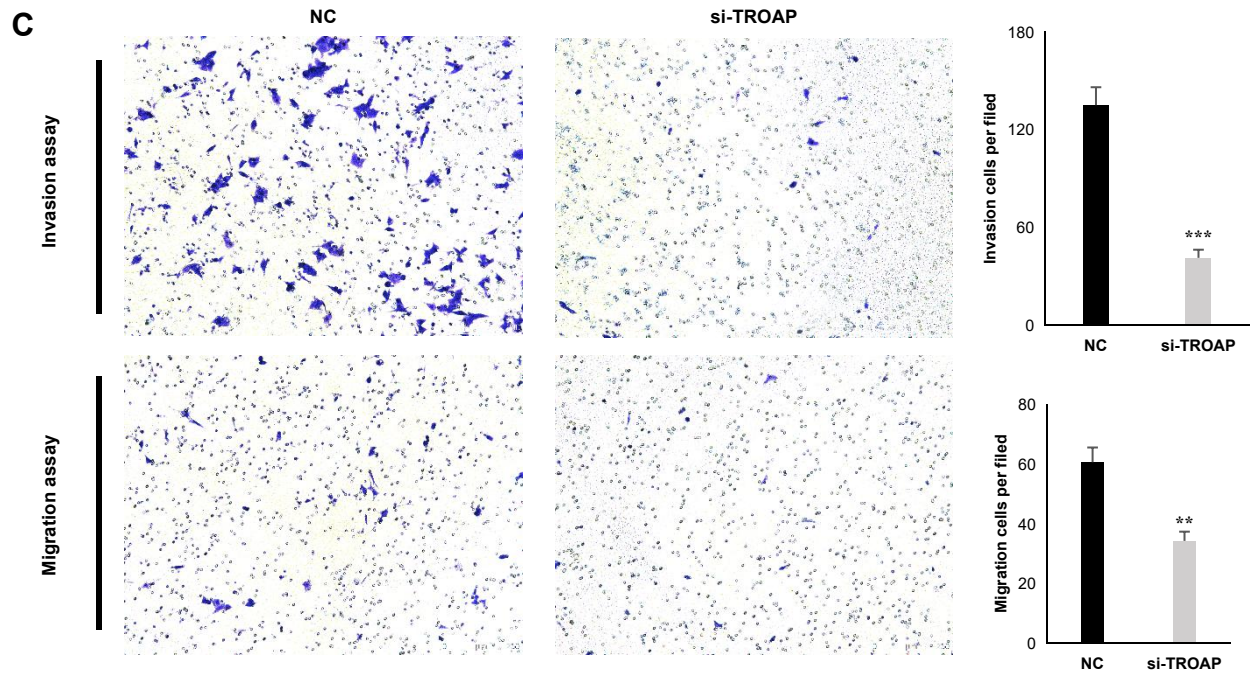

**D****Migration assay****Invasion assay**

NC

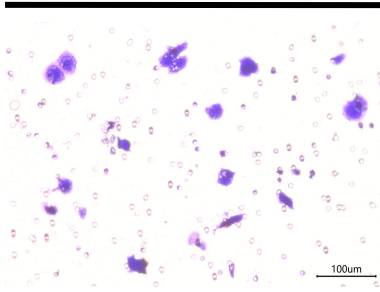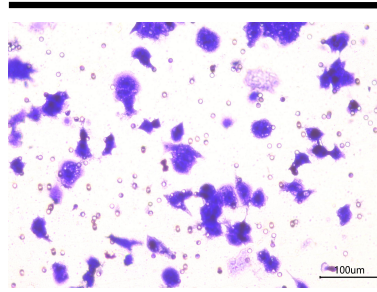

si-SOX13

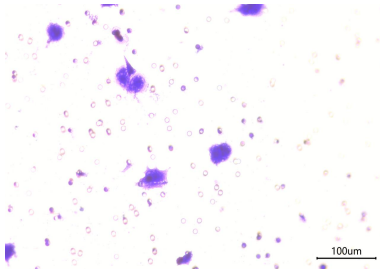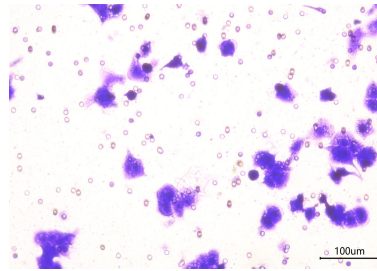

si-LMOD1

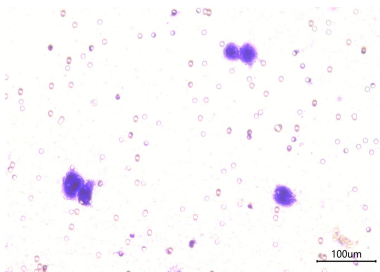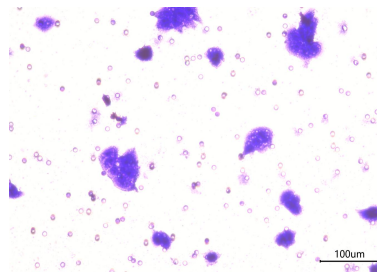

si-MAOA

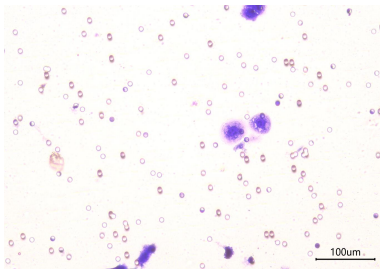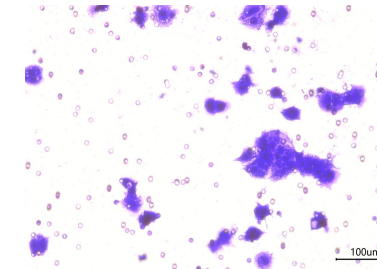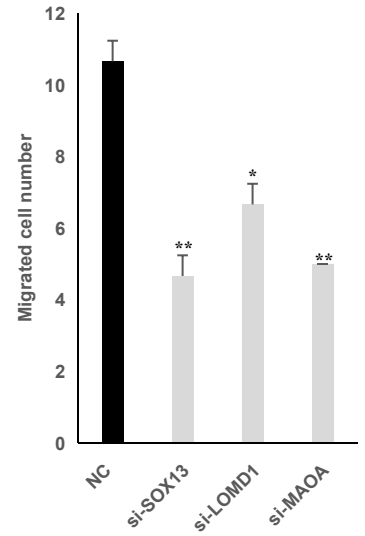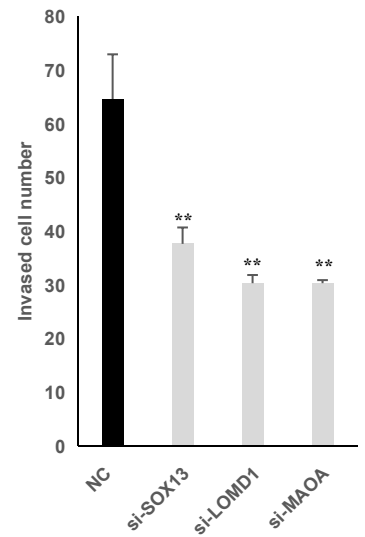

**Figure S7 Effect of *SCNN1A*, *TROAP*, *SOX13*, *MAOA* and *LMOD1* knockdown on migration and invasion of HEC-1-A.** (A) Effect of *SCNN1A*, *TROAP*, *SOX13*, *MAOA* and *LMOD1* knockdown on (B-D) invasion and migration potential of HEC-1-A, detected by transwell assay. Data are expressed as the mean  $\pm$  standard deviation of three independent experiments. \*  $P < 0.05$ ; \*\*  $P < 0.01$ ; \*\*\*  $P < 0.001$ . NC, negative control.

**Table.S1 Genome overview of TFCRs and ATAC-seq peaks**

| <b>Classification</b> | <b>Interval number</b> | <b>Total length (bp)</b> | <b>Proportion covered with genome</b> | <b>Mean</b> | <b>Standard deviation</b> |
|-----------------------|------------------------|--------------------------|---------------------------------------|-------------|---------------------------|
| <b>TFCR</b>           | 78820                  | 76320782                 | 2.51%                                 | 968.29      | 299.86                    |
| <b>ATAC-seq peaks</b> | 104723                 | 52570946                 | 1.73%                                 | 502         | 0                         |

The table shows the number of TFCRs and ATAC-seq peaks, the total number of bases, whole-genome coverage ratio, and mean and standard deviation of the number of bases between different TFCRs or ATAC-seq peaks.

**Table.S2 Mutation rate of TFCR (TC0-CAS9)**

---

| <b>Classification</b>                         | <b>Total length (bp)</b> | <b>Mutation numbers</b> | <b>Mutation rate (<math>\rho</math>)</b> |
|-----------------------------------------------|--------------------------|-------------------------|------------------------------------------|
| <b>TFCRs</b><br>(Belong to both TC0 and CAS9) | 296150                   | 342                     | 1.15 ‰                                   |
| <b>TFCRs</b>                                  | 76320782                 | 40757                   | 0.53 ‰                                   |
| <b>ATAC-seq peaks</b>                         | 52570946                 | 29993                   | 0.57 ‰                                   |
| <b>Genomes</b>                                | 3036303846               | 886377                  | 0.29 ‰                                   |

---

The table shows the differences in mutation rates ( $\rho$ ) among different taxonomic regions of the genome (such as TFCRs belonging to both TC0 and CAS9, all TFCRs, ATAC-seq peaks and the whole-genome).

**Table.S3 Small inference RNA sequence**

| <b>siRNA</b> | <b>Sequence (5'-3')</b>                          |
|--------------|--------------------------------------------------|
| si-NC1       | CGUACGCGGAAUACUUCGA TT<br>UCGAAGUAUCCGCGUACG TT  |
| si-NC2       | UUCUCCGAACGUGUCACGUTT<br>ACGUGACACGUUCGGAGAATT   |
| si-HOXA9     | UCCUCCAGUUGAUAGAGAATT<br>UUCUCUAUCAACUGGAGGATT   |
| si-TROAP     | GAAACCACCGCUCAAUAUUTT<br>AAUAUUGAGCGGUGGUUUCTT   |
| si-SCNN1A    | GGAGUGGCCAAAGUCAACA TT<br>UGUUGACUUUGGCCACUCC TT |
| si-SOX13     | GCCAUAGAGAAGCUGUUGUTT<br>ACAACAGCUUCUCUAUGGCTT   |
| si-MAOA      | GAAAGCUGAUCGACUUGCUTT<br>AGCAAGUCGAUCAGCUUUCTT   |
| si-LMOD1     | GUCUAGAGUAGCCAAAUAUTT<br>AUUUUUGGCUACUCUAGACTT   |



**Table.S4 Primes used in qPCR expirement**

| <b>Gene</b> | <b>Primer</b>            |
|-------------|--------------------------|
| GAPDH       | F: TCGGAGTCAACGGATTTGGT  |
|             | R: TTCCCGTTCTCAGCCTTGAC  |
| HOXA9       | F: TACGTGGACTCGTTCCTGCT  |
|             | R: CGTCGCCTTGGACTGGAAG   |
| TROAP       | F:CCTCCGGGGTGTATCTCCTAC  |
|             | R: ACGGCGCACGATGTAACAG   |
| SCNN1A      | F:AGGGGAACAAGCGTGAGGA    |
|             | R: GGTGGAICTGATCAGGGC    |
| SOX13       | F: CACAGATGACAGGCACTCGG  |
|             | R: TCTCTGGGGCACGAACAAGT  |
| MAOA        | F: TTCAGGACTATCTGCTGCCAA |
|             | R: GGTCCCACATAAGCTCCACC  |
| LMOD1       | F: GTAAAAGGGGAGCGTAGGAAC |
|             | R: CTCGGGTGTTTTGGTCTTGCT |
